# Supplementary material
Source: PubMed Central journal article supplement (PMC2682917)
Supplement: NIHMS86737-supplement-1_si_001.pdf [file NIHMS86737-supplement-1_si_001.pdf]

Supporting Information for

Correlation of Relaxivity with Coordination Number in

Six-, Seven-, and Eight-Coordinate Mn(II) Complexes of

Pendant-Arm Cyclen Derivatives

Sen Wang and T. David Westmoreland  
Department of Chemistry, Hall-Atwater Laboratories, Wesleyan University, Middletown,  
CT 06459

Email: westmoreland@wesleyan.edu

Contents:

|                                                           |         |
|-----------------------------------------------------------|---------|
| Crystallographic data collection and refinement details   | S2-S5   |
| Results for [Mn(DOTAM)]Cl <sub>2</sub> ·2H <sub>2</sub> O | S6-11   |
| Results for [Mn(DO3AM)][MnCl <sub>4</sub> ]·EtOH          | S12-18  |
| Results for Mn(H <sub>2</sub> DOTA)                       | S19-23  |
| Fits of magnetization vs time curves in mixed solvent     | S24-S27 |
| Summary of Electrochemical Results                        | S28     |

## X-Ray Crystallographic Analyses

All data collection and structure solutions were performed by Neil R. Brooks and Victor G. Young, Jr., X-Ray Crystallographic Laboratory, Department of Chemistry, University of Minnesota. The text below has been adapted from reports they provided.

### [Mn(DOTAM)]Cl<sub>2</sub>·2H<sub>2</sub>O

A crystal of approximate dimensions  $0.46 \times 0.38 \times 0.20$  mm<sup>3</sup> was placed onto the tip of a 0.1 mm diameter glass capillary and mounted on a Siemens CCD area detector diffractometer for data collection at 173(2)K. A preliminary set of cell constants was calculated from reflections harvested from three sets of 20 frames. These initial sets of frames were oriented such that orthogonal wedges of reciprocal space were surveyed. This produced initial orientation matrices determined from 115 reflections. The data collection was carried out using MoK $\alpha$  radiation (graphite monochromator) with a frame time of 10 seconds and a detector distance of 4.9 cm. The complete sphere of reciprocal space was surveyed to a resolution of 0.77 Å. Three major sections of frames were collected with 0.30° steps in  $\omega$  at three different  $\phi$  settings and a detector position of -28° in  $2\theta$ . The intensity data were corrected for absorption and decay (SADABS).<sup>1</sup> Final cell constants were calculated from the xyz centroids of 3508 strong reflections from the actual data after integration (SAINT 6.01, 1999).<sup>2</sup>

The structure was solved using SIR92<sup>3</sup> and refined using SHELXL-97.<sup>4</sup> The space group *C2/c* was determined based on systematic absences and intensity statistics. A direct-methods solution was calculated which provided most non-hydrogen atoms from the full E-map. Full-matrix least squares / difference Fourier cycles were performed which located the remaining non-hydrogen atoms. All non-hydrogen atoms were refined with anisotropic displacement parameters. All ligand hydrogen atoms were placed in ideal positions and refined as riding atoms with relative isotropic displacement parameters. The hydrogen atoms on the solvent water molecules were found in the difference density map and refined isotropically with no restraints. The final full matrix least squares refinement converged to  $R1 = 0.0255$  and  $wR2 = 0.0644$  ( $F^2$ , all data).

Refer to Table S1 for additional data collection and refinement information.

### [Mn(DO3AM)][MnCl<sub>4</sub>]·EtOH

A crystal of approximate dimensions  $0.16 \times 0.16 \times 0.06$  mm<sup>3</sup> was placed onto the tip of a 0.1 mm diameter glass capillary and mounted on a Bruker CCD area detector diffractometer for data collection at 173(2)K. A preliminary set of cell constants was calculated from reflections harvested from three sets of 20 frames. These initial sets of frames were oriented such that orthogonal wedges of reciprocal space were surveyed. This produced initial orientation matrices determined from 71 reflections. The data collection was carried out using MoK $\alpha$  radiation (graphite monochromator) with a frame time of 60 seconds and a detector distance of 4.9 cm. A randomly oriented region of reciprocal space was

surveyed to the extent of 1.5 hemispheres and to a resolution of 0.84 Å. Three major sections of frames were collected with 0.30° steps in  $\omega$  at three different  $\phi$  settings and a detector position of -28° in  $2\theta$ . The intensity data were corrected for absorption and decay (SADABS).<sup>1</sup> Final cell constants were calculated from the xyz centroids of 2813 strong reflections from the actual data after integration (SAINT 6.01, 1999).<sup>2</sup>

The structure was solved using SIR92<sup>3</sup> and refined using SHELXL-97.<sup>4</sup> The space group  $P2_1/n$  was determined based on systematic absences and intensity statistics. A direct-methods solution was calculated which provided most non-hydrogen atoms from the E-map. Full-matrix least squares / difference Fourier cycles were performed which located the remaining non-hydrogen atoms. The structure contains disorder for which the model was not immediately apparent. The structure is essentially that of the tri-amide substituted cyclen complex. There is, however, residual difference electron density on the order of 0.9 eÅ<sup>-3</sup> around the area where a fourth amide arm would be located. There is also a solvent ethanol molecule in this vicinity. Modeling this residual difference electron density as an amide arm seems to agree with the X-ray data. The amide arm was refined as a minor component with the ethanol molecule as the major component (88.5(7)% of the total). There are two possibilities consistent with this model: 1) that the crystal is contaminated with [Mn(DOTAM)], or 2) that the disorder arises from 90° rotations of [Mn(DO3AM)] in the site about an axis perpendicular to the plane of the ring nitrogens. For case 2, disorder at the other amide arms would be expected. Such disorder was not observed, but it is reasonable to assume that the disorder of the other three amide arms would be small and would not be detectable within the experimental error of the data. As a result, the molecular formula was taken as [Mn(DO3AM)][MnCl<sub>4</sub>].EtOH. All non-hydrogen atoms except those of the minor components in the disorder model were refined with anisotropic displacement parameters. Most hydrogen atoms were placed in ideal positions and refined as riding atoms with relative isotropic displacement parameters. The exceptions were: 1) the non-disordered NH<sub>2</sub> groups for which the hydrogen atoms were found in the difference electron density map and were refined with the constraint of equal N-H bond distances and 2) The hydrogen atom on the oxygen of the ethanol molecule was found in the difference electron density map and was refined with the constraint of a 0.84 Å O-H bond distance. There is also additional disorder in one of the amide arms. There are two positions of the arms with the major component comprising 75.9(8)% of the total. Restraints were applied to keep the bond distances and angles in both of the components the same. The final full matrix least squares refinement converged to R1 = 0.0536 and wR2 = 0.1230 (F<sup>2</sup>, all data). The program PLATON<sup>5</sup> was used to check the structure.

Refer to Table S1 for additional data collection and refinement information.

### **Mn(H<sub>2</sub>DOTA)**

A crystal of approximate dimensions 0.26 × 0.10 × 0.10 mm<sup>3</sup> was placed onto the tip of a 0.1 mm diameter glass capillary and mounted on a Bruker CCD area

detector diffractometer for data collection at 173(2)K. A preliminary set of cell constants was calculated from reflections harvested from three sets of 20 frames. These initial sets of frames were oriented such that orthogonal wedges of reciprocal space were surveyed. This produced initial orientation matrices determined from 41 reflections. The data collection was carried out using MoK $\alpha$  radiation (graphite monochromator) with a frame time of 60 seconds and a detector distance of 4.9 cm. The complete sphere of reciprocal space was surveyed to a resolution of 0.84 Å. Three major sections of frames were collected with 0.30° steps in  $\omega$  at three different  $\phi$  settings and a detector position of -28° in  $2\theta$ . The intensity data were corrected for absorption and decay (SADABS).<sup>1</sup> Final cell constants were calculated from the xyz centroids of 2827 strong reflections from the actual data after integration (SAINT 6.01, 1999).<sup>2</sup>

The structure was solved and refined using SHELXL-97.<sup>4</sup> The space group *C2/c* was determined based on systematic absences and intensity statistics. A direct-methods solution was calculated which provided most non-hydrogen atoms from the full E-map. Full-matrix least squares / difference Fourier cycles were performed which located the remaining non-hydrogen atoms. All non-hydrogen atoms were refined with anisotropic displacement parameters. All hydrogen atoms attached to carbon were placed in ideal positions and refined as riding atoms with relative isotropic displacement parameters. The hydrogen atoms attached to oxygen were found in the difference density map and allowed to refine freely. The final full matrix least squares refinement converged to R1 = 0.0314 and wR2 = 0.0840 (F<sup>2</sup>, all data). The program PLATON<sup>5</sup> was used to check the structure.

Refer to Table S1 for additional data collection and refinement information.

- 1) An empirical correction for absorption anisotropy, Blessing R. *Acta Cryst.* **1995**, *A51*, 33-38.
- 2) SAINT V6.1, Bruker Analytical X-Ray Systems, Madison, WI.
- 3) SIR92. Altomare, A.; Cascarano, G.; Giacovazzo, C.; Gualardi, A. *J. Appl. Cryst.* **1993**, *26*, 343-350.
- 4) SHELXTL-Plus V5.10, **1998**, Bruker Analytical X-Ray Systems, Madison, WI.
- 5) Spek, A. L. *J. Appl. Cryst.* **1990**, *A46*, C34. PLATON, A Multipurpose Crystallographic Tool, **2000**, Utrecht University, Utrecht, The Netherlands, A.L. Spek.

Table S1. Crystal Data and Refinement Parameters for [Mn(DOTAM)]Cl<sub>2</sub>·2H<sub>2</sub>O,  
[Mn(DO3AM)][MnCl<sub>4</sub>]·EtOH, and Mn(H<sub>2</sub>DOTA)·2H<sub>2</sub>O.

| Formula                                          | [Mn(DOTAM)]Cl <sub>2</sub> ·2H <sub>2</sub> O                                   | [Mn(DO3AM)][MnCl <sub>4</sub> ]·EtOH                                                          | Mn(H <sub>2</sub> DOTA)                                         |
|--------------------------------------------------|---------------------------------------------------------------------------------|-----------------------------------------------------------------------------------------------|-----------------------------------------------------------------|
|                                                  | C <sub>16</sub> H <sub>36</sub> Cl <sub>2</sub> MnN <sub>8</sub> O <sub>6</sub> | C <sub>16</sub> H <sub>35</sub> Cl <sub>4</sub> Mn <sub>2</sub> N <sub>7</sub> O <sub>4</sub> | C <sub>16</sub> H <sub>26</sub> MnN <sub>4</sub> O <sub>8</sub> |
| FW<br>(g mol <sup>-1</sup> )                     | 562.37                                                                          | 641.19                                                                                        | 457.35                                                          |
| <i>T</i> (K)                                     | 173(2)                                                                          | 173(2)                                                                                        | 173(2)                                                          |
| $\lambda$ (Å)                                    | 0.71073                                                                         | 0.71073                                                                                       | 0.71073                                                         |
| Crystal System                                   | monoclinic                                                                      | monoclinic                                                                                    | monoclinic                                                      |
| Space Group                                      | <i>C2/c</i>                                                                     | <i>P2<sub>1</sub>/n</i>                                                                       | <i>C2/c</i>                                                     |
| <i>a</i> (Å)                                     | 18.5798(15)                                                                     | 8.3646(8)                                                                                     | 16.374(3)                                                       |
| <i>b</i> (Å)                                     | 13.6006(11)                                                                     | 19.483(2)                                                                                     | 6.6559(13)                                                      |
| <i>c</i> (Å)                                     | 10.5800(8)                                                                      | 16.3627(16)                                                                                   | 16.750(3)                                                       |
| $\alpha$ (°)                                     | 90                                                                              | 90                                                                                            | 90                                                              |
| $\beta$ (°)                                      | 110.490(1)                                                                      | 99.254(2)                                                                                     | 98.381(3)                                                       |
| $\gamma$ (°)                                     | 90                                                                              | 90                                                                                            | 90                                                              |
| Volume (Å <sup>3</sup> )                         | 2504.4(3)                                                                       | 2631.9(5)                                                                                     | 1806.0(6)                                                       |
| <i>Z</i>                                         | 4                                                                               | 4                                                                                             | 4                                                               |
| Density (calc.)                                  | 1.492                                                                           | 1.622                                                                                         | 1.682                                                           |
| Theta Range for<br>Collection                    | 1.90°-27.49°                                                                    | 1.64°-25.03°                                                                                  | 2.46°-25.04°                                                    |
| Reflections<br>Collected                         | 10845                                                                           | 13095                                                                                         | 6602                                                            |
| Independent<br>Reflections                       | 2853                                                                            | 4626                                                                                          | 1598                                                            |
| Observed<br>Reflections                          | 2568                                                                            | 3850                                                                                          | 1381                                                            |
| Data/Restraints<br>/Parameters                   | 2853 / 0 / 158                                                                  | 4626 / 21 / 336                                                                               | 1598 / 0 / 136                                                  |
| <i>R</i> indices<br>[ <i>I</i> > 2σ( <i>I</i> )] | <i>R</i> 1 = 0.0255<br><i>wR</i> 2 = 0.0629                                     | <i>R</i> 1 = 0.0536<br><i>wR</i> 2 = 0.1177                                                   | <i>R</i> 1 = 0.0314<br><i>wR</i> 2 = 0.0782                     |
| <i>R</i> indices<br>(all data)                   | <i>R</i> 1 = 0.0296<br><i>wR</i> 2 = 0.0644                                     | <i>R</i> 1 = 0.0673<br><i>wR</i> 2 = 0.1230                                                   | <i>R</i> 1 = 0.0392<br><i>wR</i> 2 = 0.0840                     |

Figure S1. Molecular Structure of  $[\text{Mn}(\text{DOTAM})]\text{Cl}_2 \cdot 2\text{H}_2\text{O}$ .

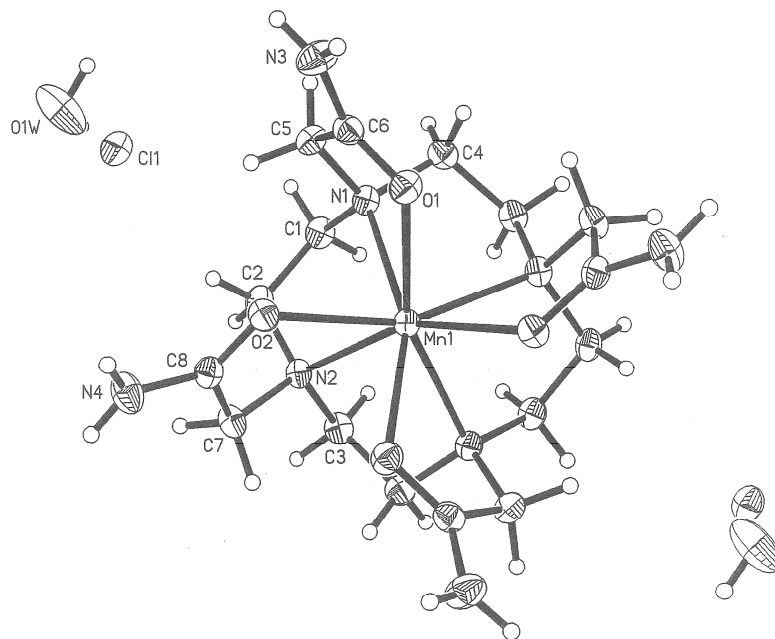

Figure S2. Crystal Structure of  $[\text{Mn}(\text{DOTAM})]\text{Cl}_2 \cdot 2\text{H}_2\text{O}$ .

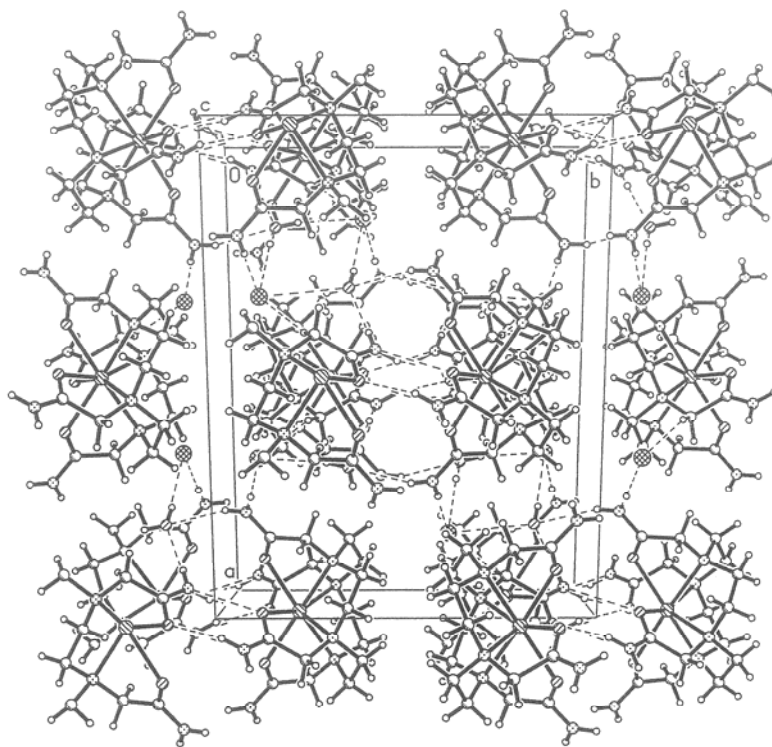

Table S2a. Atomic coordinates ( $\times 10^4$ ) and equivalent isotropic displacement parameters ( $\text{\AA}^2 \times 10^3$ ) for  $[\text{Mn}(\text{DOTAM})]\text{Cl}_2 \cdot 2\text{H}_2\text{O}$ .  $U_{\text{eq}}$  is defined as one third of the trace of the orthogonalized  $U_{ij}$  tensor.

|     | x       | y       | z       | $U_{\text{eq}}$ |
|-----|---------|---------|---------|-----------------|
| Mn1 | 5000    | 2917(1) | 2500    | 16(1)           |
| N1  | 3899(1) | 1983(1) | 2580(1) | 20(1)           |
| N2  | 5452(1) | 1962(1) | 4561(1) | 19(1)           |
| O1  | 3884(1) | 3835(1) | 1679(1) | 23(1)           |
| O2  | 4925(1) | 3809(1) | 4306(1) | 21(1)           |
| N3  | 2842(1) | 4294(1) | 2149(1) | 31(1)           |
| N4  | 5564(1) | 4202(1) | 6485(1) | 28(1)           |
| C1  | 4156(1) | 1190(1) | 3599(1) | 23(1)           |
| C2  | 4791(1) | 1544(1) | 4861(1) | 23(1)           |
| C3  | 5975(1) | 1180(1) | 4440(1) | 22(1)           |
| C4  | 3478(1) | 1557(1) | 1230(1) | 22(1)           |
| C5  | 3404(1) | 2698(1) | 2932(2) | 23(1)           |
| C6  | 3392(1) | 3660(1) | 2194(1) | 22(1)           |
| C7  | 5855(1) | 2658(1) | 5644(1) | 23(1)           |
| C8  | 5408(1) | 3612(1) | 5439(1) | 21(1)           |
| Cl1 | 3343(1) | 1151(1) | 6317(1) | 31(1)           |
| O1W | 3158(1) | 3493(1) | 6184(1) | 51(1)           |

Table S2b. Bond lengths (Å) and bond angles (°) for [Mn(DOTAM)]Cl<sub>2</sub>·2H<sub>2</sub>O.

|                     |            |                     |            |
|---------------------|------------|---------------------|------------|
| Mn(1)-O(2)          | 2.3080(9)  | N(2)-C(3)           | 1.4771(17) |
| Mn(1)-O(2)#1        | 2.3080(10) | N(2)-C(2)           | 1.4840(17) |
| Mn(1)-O(1)#1        | 2.3128(10) | O(1)-C(6)           | 1.2402(17) |
| Mn(1)-O(1)          | 2.3128(10) | O(2)-C(8)           | 1.2494(16) |
| Mn(1)-N(2)#1        | 2.4218(11) | N(3)-C(6)           | 1.3255(18) |
| Mn(1)-N(2)          | 2.4218(11) | N(4)-C(8)           | 1.3144(18) |
| Mn(1)-N(1)          | 2.4351(11) | C(1)-C(2)           | 1.518(2)   |
| Mn(1)-N(1)#1        | 2.4351(11) | C(3)-C(4)#1         | 1.518(2)   |
| N(1)-C(5)           | 1.4734(17) | C(4)-C(3)#1         | 1.518(2)   |
| N(1)-C(1)           | 1.4815(17) | C(5)-C(6)           | 1.5207(19) |
| N(1)-C(4)           | 1.4847(17) | C(7)-C(8)           | 1.5150(19) |
| N(2)-C(7)           | 1.4722(17) |                     |            |
| O(2)-Mn(1)-O(2)#1   | 116.60(5)  | O(2)-Mn(1)-N(1)#1   | 126.71(4)  |
| O(2)-Mn(1)-O(1)#1   | 73.22(4)   | O(2)#1-Mn(1)-N(1)#1 | 87.16(4)   |
| O(2)#1-Mn(1)-O(1)#1 | 73.83(3)   | O(1)#1-Mn(1)-N(1)#1 | 68.96(4)   |
| O(2)-Mn(1)-O(1)     | 73.83(3)   | O(1)-Mn(1)-N(1)#1   | 157.24(4)  |
| O(2)#1-Mn(1)-O(1)   | 73.22(3)   | N(2)#1-Mn(1)-N(1)#1 | 73.73(4)   |
| O(1)#1-Mn(1)-O(1)   | 114.67(5)  | N(2)-Mn(1)-N(1)#1   | 73.79(4)   |
| O(2)-Mn(1)-N(2)#1   | 157.64(4)  | N(1)-Mn(1)-N(1)#1   | 117.11(5)  |
| O(2)#1-Mn(1)-N(2)#1 | 68.82(4)   | C(5)-N(1)-C(1)      | 111.56(11) |
| O(1)#1-Mn(1)-N(2)#1 | 127.61(4)  | C(5)-N(1)-C(4)      | 109.60(11) |
| O(1)-Mn(1)-N(2)#1   | 88.19(4)   | C(1)-N(1)-C(4)      | 110.10(10) |
| O(2)-Mn(1)-N(2)     | 68.82(4)   | C(5)-N(1)-Mn(1)     | 105.72(8)  |
| O(2)#1-Mn(1)-N(2)   | 157.64(4)  | C(1)-N(1)-Mn(1)     | 110.10(8)  |
| O(1)#1-Mn(1)-N(2)   | 88.19(4)   | C(4)-N(1)-Mn(1)     | 109.64(8)  |
| O(1)-Mn(1)-N(2)     | 127.61(4)  | C(7)-N(2)-C(3)      | 111.07(11) |
| N(2)#1-Mn(1)-N(2)   | 115.16(5)  | C(7)-N(2)-C(2)      | 108.26(11) |
| O(2)-Mn(1)-N(1)     | 87.16(4)   | C(3)-N(2)-C(2)      | 111.16(10) |
| O(2)#1-Mn(1)-N(1)   | 126.71(4)  | C(7)-N(2)-Mn(1)     | 106.14(8)  |
| O(1)#1-Mn(1)-N(1)   | 157.24(4)  | C(3)-N(2)-Mn(1)     | 109.84(8)  |
| O(1)-Mn(1)-N(1)     | 68.96(4)   | C(2)-N(2)-Mn(1)     | 110.25(8)  |
| N(2)#1-Mn(1)-N(1)   | 73.79(4)   | C(6)-O(1)-Mn(1)     | 115.68(9)  |
| N(2)-Mn(1)-N(1)     | 73.73(4)   | C(8)-O(2)-Mn(1)     | 116.78(9)  |



Table S2b.(cont.) Bond lengths (Å) and bond angles (°) for  
[Mn(DOTAM)]Cl<sub>2</sub>·2H<sub>2</sub>O.

|                  |            |                |            |
|------------------|------------|----------------|------------|
| N(1)-C(1)-C(2)   | 111.27(11) | O(1)-C(6)-C(5) | 120.70(12) |
| N(2)-C(2)-C(1)   | 112.34(11) | N(3)-C(6)-C(5) | 116.70(12) |
| N(2)-C(3)-C(4)#1 | 111.44(11) | N(2)-C(7)-C(8) | 109.56(11) |
| N(1)-C(4)-C(3)#1 | 111.56(11) | O(2)-C(8)-N(4) | 123.38(13) |
| N(1)-C(5)-C(6)   | 109.62(11) | O(2)-C(8)-C(7) | 119.64(12) |
| O(1)-C(6)-N(3)   | 122.60(13) | N(4)-C(8)-C(7) | 116.98(12) |

Symmetry transformations used to generate equivalent atoms:

#1 -x+1,y,-z+1/2

Table S2c. Anisotropic displacement parameters (Å<sup>2</sup> × 10<sup>3</sup>) for [Mn(DOTAM)]Cl<sub>2</sub>·2H<sub>2</sub>O. The anisotropic displacement factor exponent takes the form:  $-2\pi^2[h^2 a^{*2} U_{11} + \dots + 2 h k a^* b^* U_{12}]$

|     | U <sub>11</sub> | U <sub>22</sub> | U <sub>33</sub> | U <sub>23</sub> | U <sub>13</sub> | U <sub>12</sub> |
|-----|-----------------|-----------------|-----------------|-----------------|-----------------|-----------------|
| Mn1 | 19(1)           | 15(1)           | 16(1)           | 0               | 7(1)            | 0               |
| N1  | 22(1)           | 17(1)           | 20(1)           | 1(1)            | 9(1)            | 0(1)            |
| N2  | 23(1)           | 16(1)           | 19(1)           | 0(1)            | 7(1)            | 1(1)            |
| O1  | 24(1)           | 22(1)           | 25(1)           | 3(1)            | 11(1)           | 2(1)            |
| O2  | 24(1)           | 19(1)           | 21(1)           | -1(1)           | 6(1)            | 3(1)            |
| N3  | 28(1)           | 28(1)           | 42(1)           | 8(1)            | 18(1)           | 7(1)            |
| N4  | 37(1)           | 21(1)           | 22(1)           | -3(1)           | 5(1)            | 5(1)            |
| C1  | 28(1)           | 18(1)           | 25(1)           | 4(1)            | 12(1)           | -1(1)           |
| C2  | 29(1)           | 19(1)           | 22(1)           | 4(1)            | 12(1)           | 1(1)            |
| C3  | 27(1)           | 17(1)           | 22(1)           | 2(1)            | 7(1)            | 4(1)            |
| C4  | 22(1)           | 20(1)           | 23(1)           | 0(1)            | 7(1)            | -4(1)           |
| C5  | 23(1)           | 23(1)           | 26(1)           | 1(1)            | 12(1)           | 1(1)            |
| C6  | 21(1)           | 22(1)           | 21(1)           | -1(1)           | 5(1)            | 0(1)            |
| C7  | 27(1)           | 20(1)           | 18(1)           | -1(1)           | 4(1)            | 3(1)            |
| C8  | 24(1)           | 19(1)           | 21(1)           | 0(1)            | 10(1)           | -2(1)           |
| Cl1 | 34(1)           | 30(1)           | 33(1)           | 0(1)            | 16(1)           | 3(1)            |
| O1W | 60(1)           | 35(1)           | 36(1)           | 1(1)            | -10(1)          | -10(1)          |

Table S2d. Hydrogen coordinates ( $\times 10^4$ ) and isotropic displacement parameters ( $\text{\AA}^2 \times 10^3$ ) for [Mn(DOTAM)]Cl<sub>2</sub>·2H<sub>2</sub>O.

|     | x        | y        | z        | U(eq) |
|-----|----------|----------|----------|-------|
| H3C | 2815     | 4864     | 1742     | 37    |
| H3D | 2502     | 4144     | 2526     | 37    |
| H4C | 5323     | 4768     | 6407     | 34    |
| H4D | 5909     | 4030     | 7263     | 34    |
| H1A | 4345     | 627      | 3210     | 27    |
| H1B | 3715     | 960      | 3841     | 27    |
| H2A | 4582     | 2051     | 5309     | 27    |
| H2B | 4973     | 987      | 5495     | 27    |
| H3A | 5669     | 630      | 3902     | 27    |
| H3B | 6275     | 925      | 5349     | 27    |
| H4A | 3139     | 2066     | 649      | 27    |
| H4B | 3149     | 1010     | 1325     | 27    |
| H5A | 3601     | 2814     | 3918     | 28    |
| H5B | 2875     | 2434     | 2676     | 28    |
| H7A | 6377     | 2786     | 5634     | 27    |
| H7B | 5905     | 2371     | 6531     | 27    |
| H1W | 2796(14) | 3614(17) | 5530(20) | 52(7) |
| H2W | 3262(14) | 2910(20) | 6180(30) | 64(8) |

Table S2e. Hydrogen bonds and close contacts for [Mn(DOTAM)]Cl<sub>2</sub>·2H<sub>2</sub>O. (Å and °)

| D-H...A         | d(D-H)  | d(H...A) | d(D...A)   | <(DHA) |
|-----------------|---------|----------|------------|--------|
| N3-H3C...O1W#2  | 0.88    | 2.45     | 3.297(2)   | 161.1  |
| N3-H3D...Cl1#3  | 0.88    | 2.34     | 3.2155(14) | 174.8  |
| N4-H4C...O2#4   | 0.88    | 2.07     | 2.8837(16) | 153.3  |
| N4-H4D...O1W#5  | 0.88    | 2.06     | 2.9243(19) | 167.1  |
| O1W-H1W...Cl1#3 | 0.79(2) | 2.35(2)  | 3.1378(16) | 174(2) |
| O1W-H2W...Cl1   | 0.82(3) | 2.39(3)  | 3.2018(16) | 168(2) |

Symmetry transformations used to generate equivalent atoms:

#1 -x+1,y,-z+1/2 #2 x,-y+1,z-1/2 #3 -x+1/2,-y+1/2,-z+1 #4 -x+1,-y+1,-z+1 #5 -x+1,y,-z+3/2

Figure S3. Molecular Structure of  $[\text{Mn}(\text{DO3AM})][\text{MnCl}_4]\cdot\text{EtOH}$ .

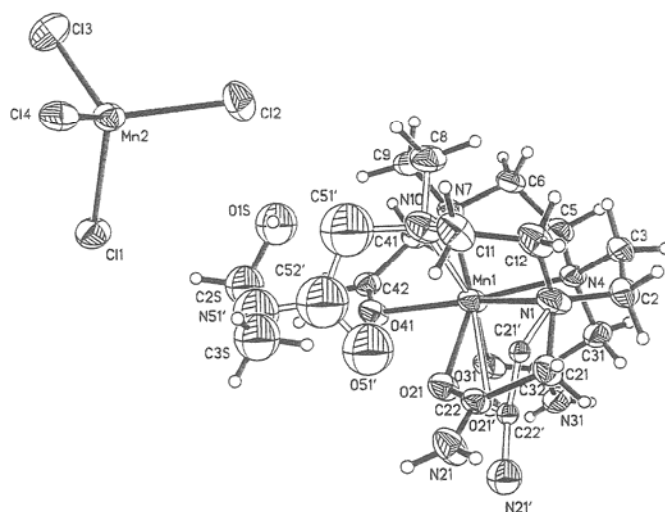

Figure S4. Crystal Structure of  $[\text{Mn}(\text{DO3AM})][\text{MnCl}_4]\cdot\text{EtOH}$ .

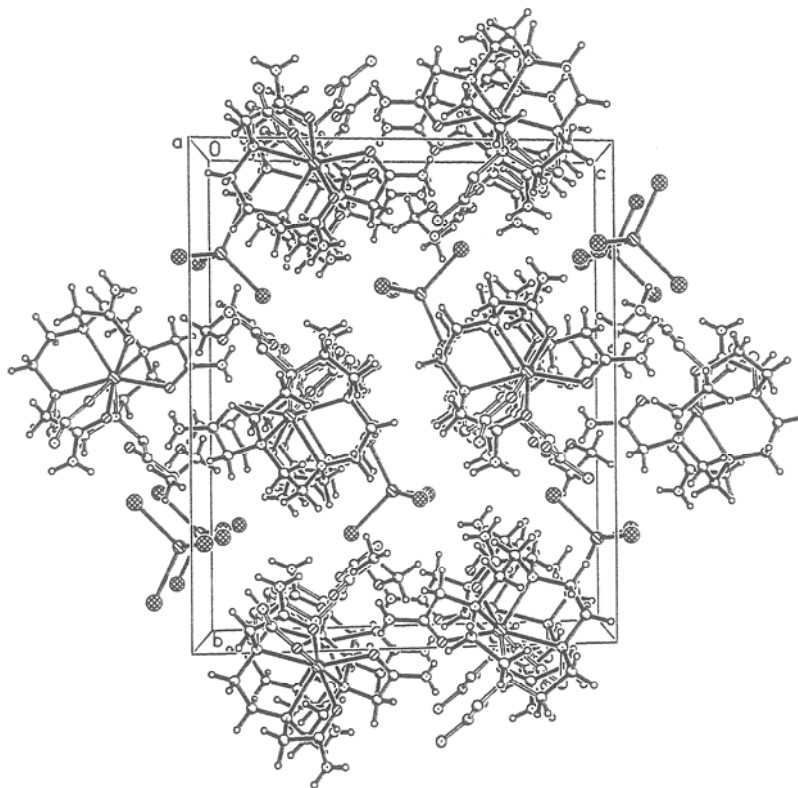

Table S3a. Atomic coordinates ( $\times 10^4$ ) and equivalent isotropic displacement parameters ( $\text{\AA}^2 \times 10^3$ ) for  $[\text{Mn}(\text{DO3AM})][\text{MnCl}_4]\cdot\text{EtOH}$ .  $U_{\text{eq}}$  is defined as one third of the trace of the orthogonalized  $U_{ij}$  tensor.

|      | x        | y        | z        | $U_{\text{eq}}$ |
|------|----------|----------|----------|-----------------|
| Mn1  | 2981(1)  | 4607(1)  | 7828(1)  | 34(1)           |
| N1   | 2575(5)  | 4947(2)  | 6385(2)  | 39(1)           |
| C2   | 2492(6)  | 4334(3)  | 5847(3)  | 39(1)           |
| C3   | 1700(6)  | 3738(3)  | 6224(3)  | 38(1)           |
| C5   | 1594(6)  | 3115(3)  | 7514(3)  | 37(1)           |
| C6   | 288(5)   | 3483(3)  | 7894(3)  | 35(1)           |
| N7   | 958(4)   | 4059(2)  | 8434(2)  | 31(1)           |
| C8   | -326(6)  | 4562(3)  | 8545(3)  | 38(1)           |
| C9   | -619(6)  | 5057(3)  | 7825(3)  | 43(1)           |
| O1S  | 872(8)   | 6103(3)  | 9299(4)  | 83(2)           |
| C2S  | 2396(11) | 6291(5)  | 9757(5)  | 72(1)           |
| C3S  | 3310(13) | 6723(6)  | 9197(7)  | 82(1)           |
| N10  | 908(5)   | 5403(2)  | 7726(3)  | 43(1)           |
| C51' | 910(4)   | 5930(2)  | 8390(3)  | 107(2)          |
| C52' | 2570(3)  | 6262(15) | 8585(18) | 57(1)           |
| O51' | 3680(3)  | 6025(12) | 8236(14) | 57(1)           |
| N51' | 2690(5)  | 6680(2)  | 9210(2)  | 82(1)           |
| C11  | 799(7)   | 5799(3)  | 6948(3)  | 48(1)           |
| C12  | 1016(6)  | 5331(3)  | 6240(3)  | 43(1)           |
| C21  | 3997(8)  | 5369(3)  | 6269(3)  | 30(1)           |
| C22  | 4750(8)  | 5709(3)  | 7079(4)  | 29(2)           |
| O21  | 4709(5)  | 5421(2)  | 7754(2)  | 32(1)           |
| N21  | 5515(6)  | 6291(3)  | 7021(3)  | 40(1)           |
| C21' | 3470(3)  | 5658(16) | 6324(17) | 32(1)           |
| C22' | 5070(3)  | 5533(13) | 6869(16) | 23(1)           |
| O21' | 5210(3)  | 5107(11) | 7434(14) | 49(1)           |
| N21' | 6240(4)  | 5939(18) | 6710(2)  | 85(1)           |
| N4   | 2553(4)  | 3583(2)  | 7070(2)  | 33(1)           |
| C31  | 4148(6)  | 3263(3)  | 7043(3)  | 40(1)           |
| C32  | 5195(6)  | 3349(3)  | 7879(3)  | 36(1)           |
| O31  | 5006(4)  | 3847(2)  | 8321(2)  | 43(1)           |
| N31  | 6299(5)  | 2870(2)  | 8097(3)  | 45(1)           |
| C41  | 1805(5)  | 3828(2)  | 9248(3)  | 31(1)           |
| C42  | 2973(5)  | 4379(3)  | 9631(3)  | 32(1)           |
| N41  | 3422(5)  | 4356(2)  | 10438(2) | 38(1)           |
| O41  | 3474(4)  | 4820(2)  | 9190(2)  | 36(1)           |
| Mn2  | 8052(1)  | 7975(1)  | 9633(4)  | 34(0)           |
| C11  | 10769(2) | 7843(1)  | 10323(8) | 44(0)           |
| C12  | 7737(2)  | 7086(1)  | 8596(1)  | 48(0)           |
| C13  | 6210(2)  | 7852(1)  | 10547(1) | 51(0)           |
| C14  | 7818(1)  | 9080(1)  | 9032(1)  | 37(0)           |

Table S3b. Bond lengths (Å) and bond angles (°) for [Mn(DO3AM)][MnCl<sub>4</sub>].EtOH.

|                    |            |                   |            |
|--------------------|------------|-------------------|------------|
| Mn(1)-O(21)        | 2.162(4)   | N(10)-C(51')      | 1.49(2)    |
| Mn(1)-O(41)        | 2.238(3)   | N(10)-C(11)       | 1.479(6)   |
| Mn(1)-O(31)        | 2.297(4)   | C(51')-C(52')     | 1.519(19)  |
| Mn(1)-N(10)        | 2.312(5)   | C(52')-O(51')     | 1.252(18)  |
| Mn(1)-O(21')       | 2.28(2)    | C(52')-N(51')     | 1.297(19)  |
| Mn(1)-N(4)         | 2.348(4)   | C(11)-C(12)       | 1.507(8)   |
| Mn(1)-N(7)         | 2.351(4)   | C(21)-C(22)       | 1.524(8)   |
| Mn(1)-N(1)         | 2.423(4)   | C(22)-O(21)       | 1.245(6)   |
| N(1)-C(2)          | 1.478(7)   | C(22)-N(21)       | 1.313(7)   |
| N(1)-C(21)         | 1.483(7)   | C(21)'-C(22)'     | 1.503(18)  |
| N(1)-C(12)         | 1.490(7)   | C(22)'-O(21)'     | 1.235(17)  |
| N(1)-C(21)'        | 1.59(3)    | C(22)'-N(21)'     | 1.321(18)  |
| C(2)-C(3)          | 1.516(7)   | N(4)-C(31)        | 1.480(6)   |
| C(3)-N(4)          | 1.482(5)   | C(31)-C(32)       | 1.510(6)   |
| C(5)-N(4)          | 1.481(6)   | C(32)-O(31)       | 1.236(6)   |
| C(5)-C(6)          | 1.521(7)   | C(32)-N(31)       | 1.320(6)   |
| C(6)-N(7)          | 1.480(6)   | C(41)-C(42)       | 1.517(6)   |
| N(7)-C(41)         | 1.475(6)   | C(42)-O(41)       | 1.239(6)   |
| N(7)-C(8)          | 1.487(6)   | C(42)-N(4)1       | 1.314(6)   |
| C(8)-C(9)          | 1.512(7)   | Mn(2)-Cl(3)       | 2.3260(15) |
| C(9)-N(10)         | 1.476(7)   | Mn(2)-Cl(4)       | 2.3624(15) |
| O(1S)-C((2S)       | 1.419(10)  | Mn(2)-Cl(1)       | 2.3831(14) |
| C((2S)-C(3S)       | 1.535(14)  | Mn(2)-Cl(2)       | 2.4085(15) |
| O(21)-Mn(1)-O(41)  | 84.38(13)  | N(10)-Mn(1)-N(4)  | 118.89(14) |
| O(21)-Mn(1)-O(21') | 24.4(6)    | O(21)-Mn(1)-N(7)  | 152.90(15) |
| O(41)-Mn(1)-O(21') | 100.0(6)   | O(41)-Mn(1)-N(7)  | 72.22(12)  |
| O(21)-Mn(1)-O(31)  | 91.73(14)  | O(21')-Mn(1)-N(7) | 170.9(5)   |
| O(41)-Mn(1)-O(31)  | 76.28(13)  | O(31)-Mn(1)-N(7)  | 95.70(13)  |
| O(21')-Mn(1)-O(31) | 77.6(5)    | N(10)-Mn(1)-N(7)  | 75.71(15)  |
| O(21)-Mn(1)-N(10)  | 90.28(16)  | N(4)-Mn(1)-N(7)   | 77.12(13)  |
| O(41)-Mn(1)-N(10)  | 87.91(14)  | O(21)-Mn(1)-N(1)  | 74.66(13)  |
| O(21')-Mn(1)-N(10) | 109.3(6)   | O(41)-Mn(1)-N(1)  | 153.39(14) |
| O(31)-Mn(1)-N(10)  | 163.79(14) | O(21')-Mn(1)-N(1) | 66.5(5)    |
| O(21)-Mn(1)-N(4)   | 129.82(15) | O(31)-Mn(1)-N(1)  | 119.85(14) |
| O(41)-Mn(1)-N(4)   | 132.21(13) | N(10)-Mn(1)-N(1)  | 76.16(15)  |
| O(21')-Mn(1)-N(4)  | 105.9(7)   | N(4)-Mn(1)-N(1)   | 74.40(14)  |
| O(31)-Mn(1)-N(4)   | 71.24(13)  | N(7)-Mn(1)-N(1)   | 122.50(13) |
| C(2)-N(1)-C(21)    | 109.5(4)   | N(1)-C(12)-C(11)  | 113.1(4)   |
| C(2)-N(1)-C(12)    | 110.8(4)   | N(1)-C(21)-C(22)  | 111.0(4)   |
| C(21)-N(1)-C(12)   | 113.6(4)   | O(21)-C(22)-N(21) | 122.4(5)   |
| C(2)-N(1)-C(21)'   | 130.3(13)  | O(21)-C(22)-C(21) | 120.6(5)   |
| C(21)-N(1)-C(21)'  | 27.3(10)   | N(21)-C(22)-C(21) | 116.8(5)   |
| C(12)-N(1)-C(21)'  | 87.7(10)   | C(22)-O(21)-Mn(1) | 119.6(3)   |

Table S3b.(cont.) Bond angles (°) for [Mn(DO3AM)][MnCl<sub>4</sub>].EtOH.

|                      |           |                      |           |
|----------------------|-----------|----------------------|-----------|
| C(2)-N(1)-Mn(1)      | 110.2(3)  | C(22')-C(21')-N(1)   | 101.8(18) |
| C(21)-N(1)-Mn(1)     | 106.6(3)  | O(21')-C(22')-N(21') | 125(2)    |
| C(12)-N(1)-Mn(1)     | 105.9(3)  | O(21')-C(22')-C(21') | 121(2)    |
| C(21')-N(1)-Mn(1)    | 107.8(10) | N(21')-C(22')-C(21') | 114(2)    |
| N(1)-C(2)-C(3)       | 111.1(4)  | C(22')-O(21')-Mn(1)  | 121.0(16) |
| N(4)-C(3)-C(2)       | 111.1(4)  | C(31)-N(4)-C(5)      | 108.5(4)  |
| N(4)-C(5)-C(6)       | 113.0(4)  | C(31)-N(4)-C(3)      | 111.1(4)  |
| N(7)-C(6)-C(5)       | 111.9(4)  | C(5)-N(4)-C(3)       | 111.5(4)  |
| C(41)-N(7)-C(6)      | 112.8(4)  | C(31)-N(4)-Mn(1)     | 108.2(3)  |
| C(41)-N(7)-C(8)      | 110.0(4)  | C(5)-N(4)-Mn(1)      | 108.2(3)  |
| C(6)-N(7)-C(8)       | 111.2(4)  | C(3)-N(4)-Mn(1)      | 109.3(3)  |
| C(41)-N(7)-Mn(1)     | 104.2(3)  | N(4)-C(31)-C(32)     | 108.8(4)  |
| C(6)-N(7)-Mn(1)      | 108.8(3)  | O(31)-C(32)-N(31)    | 123.1(4)  |
| C(8)-N(7)-Mn(1)      | 109.5(3)  | O(31)-C(32)-C(31)    | 120.4(5)  |
| N(7)-C(8)-C(9)       | 110.8(4)  | N(31)-C(32)-C(31)    | 116.5(5)  |
| N(10)-C(9)-C(8)      | 110.0(4)  | C(32)-O(31)-Mn(1)    | 117.3(3)  |
| O(1S)-C(2S)-C(3S)    | 108.5(8)  | N(7)-C(41)-C(42)     | 110.0(4)  |
| C(9)-N(10)-C(11)     | 113.4(4)  | O(41)-C(42)-N(41)    | 122.7(4)  |
| C(9)-N(10)-C(51')    | 97.8(12)  | O(41)-C(42)-C(41)    | 120.4(4)  |
| C(11)-N(10)-C(51')   | 105(2)    | N(41)-C(42)-C(41)    | 116.9(4)  |
| C(9)-N(10)-Mn(1)     | 109.7(3)  | C(42)-O(41)-Mn(1)    | 115.2(3)  |
| C(11)-N(10)-Mn(1)    | 110.7(3)  | Cl(3)-Mn(2)-Cl(4)    | 110.04(5) |
| C(51')-N(10)-Mn(1)   | 119.8(18) | Cl(3)-Mn(2)-Cl(1)    | 111.34(6) |
| N(10)-C(51')-C(52')  | 109.8(18) | Cl(4)-Mn(2)-Cl(1)    | 107.71(5) |
| O(51')-C(52')-N(51') | 129(2)    | Cl(3)-Mn(2)-Cl(2)    | 111.75(6) |
| O(51')-C(52')-C(51') | 118(2)    | Cl(4)-Mn(2)-Cl(2)    | 111.66(5) |
| N(51')-C(52')-C(51') | 112(2)    | Cl(1)-Mn(2)-Cl(2)    | 104.16(6) |
| N(10)-C(11)-C(12)    | 110.4(4)  | Cl(1)-Mn(2)-Cl(2)    | 104.16(6) |

Table S3c. Anisotropic displacement parameters ( $\text{\AA}^2 \times 10^3$ ) for  $[\text{Mn}(\text{DO3AM})][\text{MnCl}_4]\cdot\text{EtOH}$ .  
 The anisotropic displacement factor exponent takes the form:  $-2\pi^2[h^2 a^{*2} U_{11} + \dots + 2 h k a^* b^* U_{12}]$

|     | $U_{11}$ | $U_{22}$ | $U_{33}$ | $U_{23}$ | $U_{13}$ | $U_{12}$ |
|-----|----------|----------|----------|----------|----------|----------|
| Mn1 | 24(1)    | 56(1)    | 22(4)    | 6(1)     | 0(1)     | -6(3)    |
| N1  | 29(2)    | 55(3)    | 30(2)    | 10(2)    | -4(2)    | -10(2)   |
| C2  | 33(3)    | 61(3)    | 21(2)    | 3(2)     | -3(2)    | -1(2)    |
| C3  | 29(3)    | 57(3)    | 24(2)    | -2(2)    | -5(2)    | 1(2)     |
| C5  | 30(3)    | 50(3)    | 29(2)    | 1(2)     | -1(2)    | -6(2)    |
| C6  | 24(2)    | 48(3)    | 29(2)    | 3(2)     | 0(2)     | -8(2)    |
| N7  | 25(2)    | 45(2)    | 23(2)    | 2(2)     | 2(2)     | -5(2)    |
| C8  | 26(2)    | 48(3)    | 39(3)    | 0(2)     | 5(2)     | 0(2)     |
| C9  | 28(3)    | 56(3)    | 44(3)    | 6(3)     | -2(2)    | 4(2)     |
| N10 | 43(3)    | 49(3)    | 34(2)    | 4(2)     | -5(19)   | -8(2)    |
| C11 | 55(4)    | 46(3)    | 39(3)    | 11(2)    | -4(3)    | -9(3)    |
| C12 | 45(3)    | 48(3)    | 31(3)    | 10(2)    | -7(2)    | -8(3)    |
| C21 | 32(3)    | 35(4)    | 22(3)    | 4(2)     | 1(2)     | -2(3)    |
| C22 | 25(3)    | 39(4)    | 23(3)    | 0(3)     | 3(3)     | -2(3)    |
| O21 | 31(2)    | 46(3)    | 19(2)    | 0(2)     | 3(16)    | -10(2)   |
| N21 | 49(3)    | 44(3)    | 24(2)    | 3(2)     | -2(2)    | -14(3)   |
| N4  | 20(2)    | 54(3)    | 23(2)    | 1(2)     | -2(2)    | 0(2)     |
| C31 | 25(2)    | 64(4)    | 30(3)    | 1(2)     | 2(2)     | 7(2)     |
| C32 | 25(2)    | 54(3)    | 30(2)    | 6(2)     | 7(2)     | -4(2)    |
| O31 | 28(2)    | 54(2)    | 41(2)    | 4(2)     | -8(2)    | -3(16)   |
| N31 | 30(2)    | 70(3)    | 32(2)    | 0(2)     | -1(2)    | 9(2)     |
| C41 | 27(2)    | 41(3)    | 25(2)    | 3(2)     | 4(2)     | -5(2)    |
| C42 | 25(2)    | 43(3)    | 28(2)    | 4(2)     | 2(2)     | 2(2)     |
| N41 | 41(2)    | 50(3)    | 23(2)    | 4(2)     | 2(2)     | -13(2)   |
| O41 | 34(2)    | 46(2)    | 26(2)    | 6(2)     | 1(14)    | -12(2)   |
| Mn2 | 29(1)    | 43(1)    | 29(1)    | 2(1)     | 2(1)     | 1(1)     |
| Cl1 | 32(1)    | 62(9)    | 34(1)    | 0(1)     | -2(1)    | 8(1)     |
| Cl2 | 60(9)    | 52(1)    | 32(1)    | -6(1)    | 6(1)     | -16(1)   |
| Cl3 | 51(1)    | 54(1)    | 51(1)    | 12(7)    | 22(1)    | 11(1)    |
| Cl4 | 27(1)    | 47(1)    | 36(1)    | 7(1)     | -1(1)    | 1(1)     |



Table S3d. Hydrogen coordinates ( $\times 10^4$ ) and isotropic displacement parameters ( $\text{\AA}^2 \times 10^3$ ) for  $[\text{Mn}(\text{DO3AM})][\text{MnCl}_4]\cdot\text{EtOH}$ .

|      | x     | y    | z     | U(eq) |
|------|-------|------|-------|-------|
| H2A  | 3599  | 4202 | 5768  | 47    |
| H2B  | 1862  | 4445 | 5298  | 47    |
| H3A  | 555   | 3852 | 6247  | 45    |
| H3B  | 1718  | 3327 | 5869  | 45    |
| H5A  | 2333  | 2877 | 7958  | 45    |
| H5B  | 1078  | 2761 | 7123  | 45    |
| H6A  | -545  | 3662 | 7446  | 41    |
| H6B  | -243  | 3152 | 8223  | 41    |
| H8A  | 5     | 4821 | 9065  | 45    |
| H8B  | -1343 | 4315 | 8589  | 45    |
| H9A  | -1048 | 4805 | 7311  | 52    |
| H9B  | -1433 | 5403 | 7923  | 52    |
| H1S  | 512   | 6427 | 8983  | 124   |
| H2S1 | 3028  | 5875 | 9945  | 86    |
| H2S2 | 2239  | 6560 | 10251 | 86    |
| H3S1 | 4368  | 6856 | 9505  | 124   |
| H3S2 | 2681  | 7136 | 9018  | 124   |
| H3S3 | 3464  | 6452 | 8711  | 124   |
| H10A | 1129  | 5699 | 8139  | 52    |
| H51A | 625   | 5716 | 8892  | 129   |
| H51B | 87    | 6288 | 8198  | 129   |
| H11A | 1646  | 6158 | 7011  | 58    |
| H11B | -270  | 6027 | 6827  | 58    |
| H12A | 109   | 4999 | 6150  | 51    |
| H12B | 968   | 5609 | 5729  | 51    |
| H21A | 3657  | 5726 | 5847  | 36    |
| H21B | 4814  | 5074 | 6066  | 36    |
| H21C | 6024  | 6492 | 7471  | 48    |
| H21D | 5520  | 6480 | 6533  | 48    |
| H21E | 3612  | 5760 | 5747  | 39    |
| H21F | 2871  | 6040 | 6537  | 39    |
| H21G | 7207  | 5916 | 7013  | 102   |
| H21H | 6059  | 6232 | 6294  | 102   |
| H31A | 4671  | 3485 | 6611  | 48    |
| H31B | 4008  | 2769 | 6908  | 48    |
| H31  | 6943  | 2897 | 8577  | 53    |
| H32  | 6389  | 2524 | 7762  | 53    |
| H41A | 2407  | 3399 | 9181  | 37    |
| H41B | 1005  | 3730 | 9618  | 37    |
| H41  | 4106  | 4663 | 10686 | 46    |
| H42  | 3040  | 4034 | 10731 | 46    |

Table S3e. Hydrogen bonds for [Mn(DO3AM)][MnCl<sub>4</sub>].EtOH. (Å and °)

| D-H...A          | d(D-H) | d(H...A) | d(D..A)  | <DHA) |
|------------------|--------|----------|----------|-------|
| O1S-H1S...Cl2    | 0.84   | 2.64     | 3.301(7) | 136.6 |
| N21-H21C...Cl2#1 | 0.88   | 2.44     | 3.309(5) | 171.7 |
| N21-H21D...Cl1#2 | 0.88   | 2.42     | 3.287(5) | 170.4 |
| N21'-H21H...Cl1  | 0.88   | 2.39     | 3.26(3)  | 171.0 |
| N31-H32...Cl2#4  | 0.88   | 2.59     | 3.373(5) | 148.2 |
| N31-H31...Cl1#3  | 0.88   | 2.81     | 3.549(4) | 143.0 |
| N41-H41...O41#4  | 0.88   | 2.24     | 3.030(5) | 149.1 |
| N41-H42...Cl2#5  | 0.88   | 2.57     | 3.439(4) | 167.4 |
| N10-H10A...O1S   | 0.88   | 2.10     | 2.917(8) | 153.6 |

Symmetry transformations used to generate equivalent atoms:

#1  $x+1, y, z$  #2  $x+1/2, -y+3/2, z-1/2$  #3  $-x+1/2, -y-1/2, -z+3/2$  #4  $-x+1, -y+1, -z+2$   
 #5  $-x, -y+1, -z+2$

Figure S5. Molecular Structure of Mn(H<sub>2</sub>DOTA).

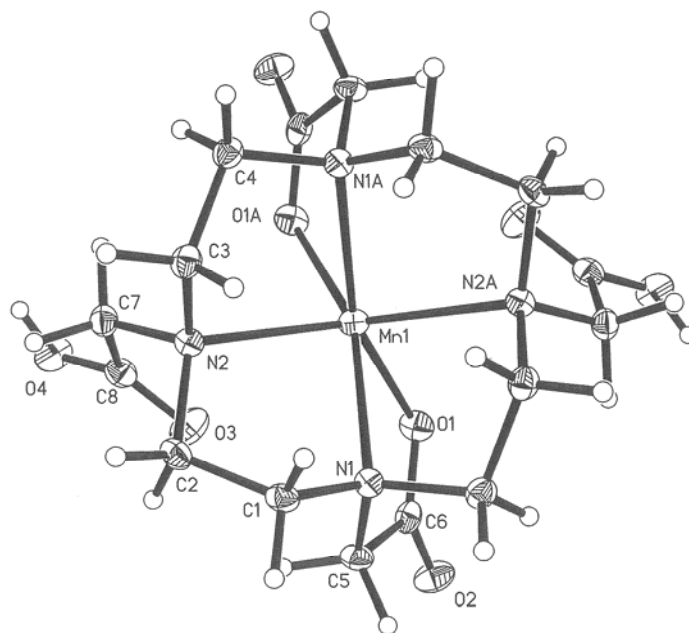

Figure S6. Crystal Structure of Mn(H<sub>2</sub>DOTA).

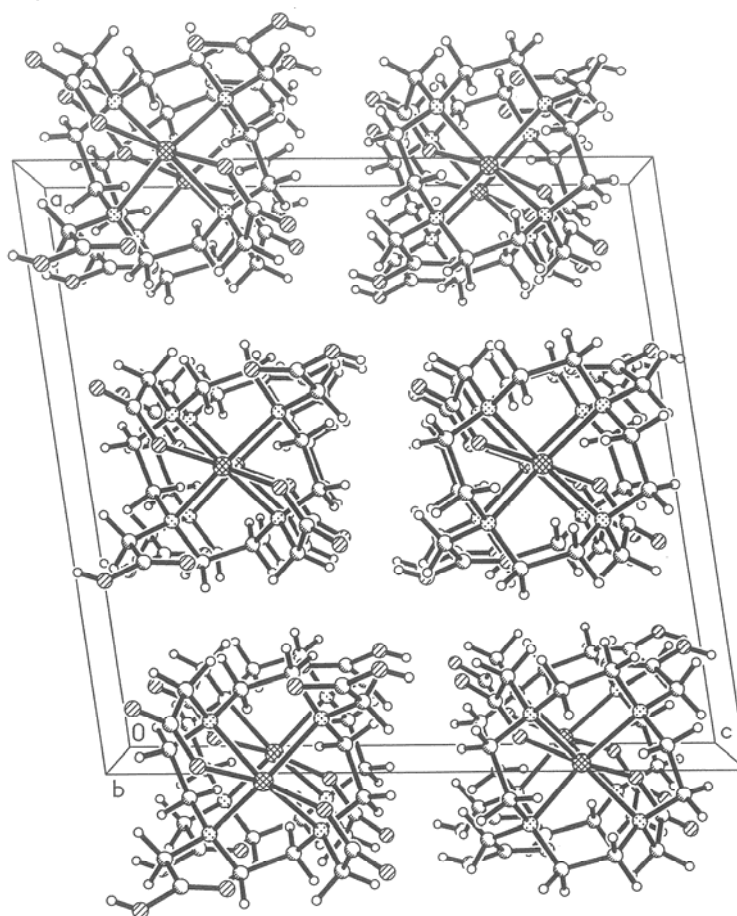

Table S4a. Atomic coordinates ( $\times 10^4$ ) and equivalent isotropic displacement parameters ( $\text{\AA}^2 \times 10^3$ ) for Mn(H<sub>2</sub>DOTA).  $U_{\text{eq}}$  is defined as one third of the trace of the orthogonalized  $U_{ij}$  tensor.

|     | x       | y       | z       | $U_{\text{eq}}$ |
|-----|---------|---------|---------|-----------------|
| Mn1 | 5000    | 2917(1) | 2500    | 16(1)           |
| N1  | 3899(1) | 1983(1) | 2580(1) | 20(1)           |
| N2  | 5452(1) | 1962(1) | 4561(1) | 19(1)           |
| O1  | 3884(1) | 3835(1) | 1679(1) | 23(1)           |
| O2  | 4925(1) | 3809(1) | 4306(1) | 21(1)           |
| N3  | 2842(1) | 4294(1) | 2149(1) | 31(1)           |
| N4  | 5564(1) | 4202(1) | 6485(1) | 28(1)           |
| C1  | 4156(1) | 1190(1) | 3599(1) | 23(1)           |
| C2  | 4791(1) | 1544(1) | 4861(1) | 23(1)           |
| C3  | 5975(1) | 1180(1) | 4440(1) | 22(1)           |
| C4  | 3478(1) | 1557(1) | 1230(1) | 22(1)           |
| C5  | 3404(1) | 2698(1) | 2932(2) | 23(1)           |
| C6  | 3392(1) | 3660(1) | 2194(1) | 22(1)           |
| C7  | 5855(1) | 2658(1) | 5644(1) | 23(1)           |
| C8  | 5408(1) | 3612(1) | 5439(1) | 21(1)           |
| C11 | 3343(1) | 1151(1) | 6317(1) | 31(1)           |
| O1W | 3158(1) | 3493(1) | 6184(1) | 51(1)           |

Table S4b. Bond lengths (Å) and bond angles (°) for Mn(H<sub>2</sub>DOTA).

|                     |            |                  |            |
|---------------------|------------|------------------|------------|
| Mn(1)-O(1)          | 2.1601(16) | N(2)-C(3)        | 1.490(3)   |
| Mn(1)-O(1)#1        | 2.1601(16) | O(1)-C(6)        | 1.265(3)   |
| Mn(1)-N(1)          | 2.3481(19) | O(2)-C(6)        | 1.252(3)   |
| Mn(1)-N(1)#1        | 2.3481(18) | O(3)-C(8)        | 1.210(3)   |
| Mn(1)-N(2)          | 2.3803(18) | O(4)-C(8)        | 1.327(3)   |
| Mn(1)-N(2)#1        | 2.3803(18) | C(1)-C(2)        | 1.512(3)   |
| N(1)-C(5)           | 1.472(3)   | C(3)-C(4)        | 1.516(3)   |
| N(1)-C(4)#1         | 1.482(3)   | C(4)-N(1)#1      | 1.482(3)   |
| N(1)-C(1)           | 1.485(3)   | C(5)-C(6)        | 1.530(3)   |
| N(2)-C(7)           | 1.472(3)   | C(7)-C(8)        | 1.514(3)   |
| N(2)-C(2)           | 1.488(3)   |                  |            |
| O(1)-Mn(1)-O(1)#1   | 101.03(9)  | C(1)-N(1)-Mn(1)  | 111.06(13) |
| O(1)-Mn(1)-N(1)     | 73.81(6)   | C(7)-N(2)-C(2)   | 109.78(17) |
| O(1)#1-Mn(1)-N(1)   | 157.21(6)  | C(7)-N(2)-C(3)   | 109.60(17) |
| O(1)-Mn(1)-N(1)#1   | 157.21(6)  | C(2)-N(2)-C(3)   | 108.72(17) |
| O(1)#1-Mn(1)-N(1)#1 | 73.81(6)   | C(7)-N(2)-Mn(1)  | 112.68(13) |
| N(1)-Mn(1)-N(1)#1   | 119.25(9)  | C(2)-N(2)-Mn(1)  | 110.69(13) |
| O(1)-Mn(1)-N(2)     | 125.72(6)  | C(3)-N(2)-Mn(1)  | 105.22(13) |
| O(1)#1-Mn(1)-N(2)   | 91.76(6)   | C(6)-O(1)-Mn(1)  | 119.20(14) |
| N(1)-Mn(1)-N(2)     | 74.72(6)   | N(1)-C(1)-C(2)   | 111.07(18) |
| N(1)#1-Mn(1)-N(2)   | 76.99(6)   | N(2)-C(2)-C(1)   | 111.55(18) |
| O(1)-Mn(1)-N(2)#1   | 91.76(6)   | N(2)-C(3)-C(4)   | 111.76(18) |
| O(1)#1-Mn(1)-N(2)#1 | 125.72(6)  | N(1)#1-C(4)-C(3) | 111.32(18) |
| N(1)-Mn(1)-N(2)#1   | 76.99(6)   | N(1)-C(5)-C(6)   | 110.69(18) |
| N(1)#1-Mn(1)-N(2)#1 | 74.72(6)   | O(2)-C(6)-O(1)   | 125.0(2)   |
| N(2)-Mn(1)-N(2)#1   | 122.21(9)  | O(2)-C(6)-C(5)   | 117.4(2)   |
| C(5)-N(1)-C(4)#1    | 109.23(18) | O(1)-C(6)-C(5)   | 117.6(2)   |
| C(5)-N(1)-C(1)      | 111.80(17) | N(2)-C(7)-C(8)   | 112.93(19) |
| C(4)#1-N(1)-C(1)    | 110.71(17) | O(3)-C(8)-O(4)   | 121.2(2)   |
| C(5)-N(1)-Mn(1)     | 104.83(13) | O(3)-C(8)-C(7)   | 123.9(2)   |
| C(4)#1-N(1)-Mn(1)   | 109.01(13) | O(4)-C(8)-C(7)   | 114.9(2)   |

Symmetry transformations used to generate equivalent atoms: #1 -x+1,y,-z+3/2

Table S4c. Anisotropic displacement parameters ( $\text{\AA}^2 \times 10^3$ ) for Mn(H<sub>2</sub>DOTA). The anisotropic displacement factor exponent takes the form:  $-2\pi^2[h^2 a^{*2} U_{11} + \dots + 2 h k a^* b^* U_{12}]$

|     | $U_{11}$ | $U_{22}$ | $U_{33}$ | $U_{23}$ | $U_{13}$ | $U_{12}$ |
|-----|----------|----------|----------|----------|----------|----------|
| Mn1 | 15(1)    | 14(1)    | 16(1)    | 0        | 4(1)     | 0        |
| N1  | 14(1)    | 11(1)    | 15(1)    | -1(1)    | 2(1)     | 0(1)     |
| N2  | 14(1)    | 13(1)    | 15(1)    | 0(1)     | 2(1)     | 0(1)     |
| O1  | 19(1)    | 15(1)    | 24(1)    | -2(1)    | 5(1)     | -2(1)    |
| O2  | 32(1)    | 20(1)    | 24(1)    | -5(1)    | 12(1)    | -1(1)    |
| O3  | 39(1)    | 21(1)    | 20(1)    | -1(1)    | 8(1)     | 3(1)     |
| O4  | 29(1)    | 21(1)    | 22(1)    | 5(1)     | 7(1)     | 9(1)     |
| C1  | 14(1)    | 15(1)    | 18(1)    | -2(1)    | 5(1)     | -4(1)    |
| C2  | 12(1)    | 15(1)    | 20(1)    | -2(1)    | 2(1)     | -3(1)    |
| C3  | 18(1)    | 14(1)    | 15(1)    | -2(1)    | 2(1)     | 1(1)     |
| C4  | 17(1)    | 15(1)    | 14(1)    | -1(1)    | 3(1)     | 1(1)     |
| C5  | 14(1)    | 17(1)    | 19(1)    | -2(1)    | 6(1)     | 1(1)     |
| C6  | 21(1)    | 16(1)    | 13(1)    | 2(1)     | 0(1)     | 3(1)     |
| C7  | 16(1)    | 18(1)    | 15(1)    | -1(1)    | 0(1)     | 2(1)     |
| C8  | 16(1)    | 16(1)    | 21(1)    | 2(1)     | 3(1)     | -1(1)    |

Table S4d. Hydrogen coordinates ( $\times 10^4$ ) and isotropic displacement parameters ( $\text{\AA}^2 \times 10^3$ ) for Mn(H<sub>2</sub>DOTA).

|     | x        | y        | z        | U(eq)  |
|-----|----------|----------|----------|--------|
| H1A | 5985     | 6788     | 7310     | 19     |
| H1B | 6834     | 6030     | 7044     | 19     |
| H2A | 7056     | 3807     | 8122     | 19     |
| H2B | 6869     | 5965     | 8477     | 19     |
| H3A | 5352     | 6698     | 8358     | 19     |
| H3B | 5740     | 6232     | 9273     | 19     |
| H4A | 4676     | 3906     | 9387     | 18     |
| H4B | 4289     | 6065     | 9136     | 18     |
| H5A | 6902     | 2227     | 6979     | 19     |
| H5B | 6703     | 2999     | 6065     | 19     |
| H7A | 5802     | 2438     | 9516     | 20     |
| H7B | 6701     | 3389     | 9526     | 20     |
| H1  | 6710(20) | -220(50) | 9950(20) | 41(10) |

Table S4e. Hydrogen bond for Mn(H<sub>2</sub>DOTA). ( $\text{\AA}$  and  $^\circ$ )

| D-H...A      | d(D-H)  | d(H...A) | d(D...A) | $\angle(\text{DHA})$ |
|--------------|---------|----------|----------|----------------------|
| O4-H1...O2#2 | 0.80(3) | 1.79(4)  | 2.577(3) | 172(3)               |

Symmetry transformations used to generate equivalent atoms:

#1  $-x+1, y, -z+3/2$  #2  $x, -y, z+1/2$

Figure S7. Fit of Magnetization vs time curve of  $\text{Mn}^{2+}$  in 1:1 MeOH:H<sub>2</sub>O to a single exponential decay.

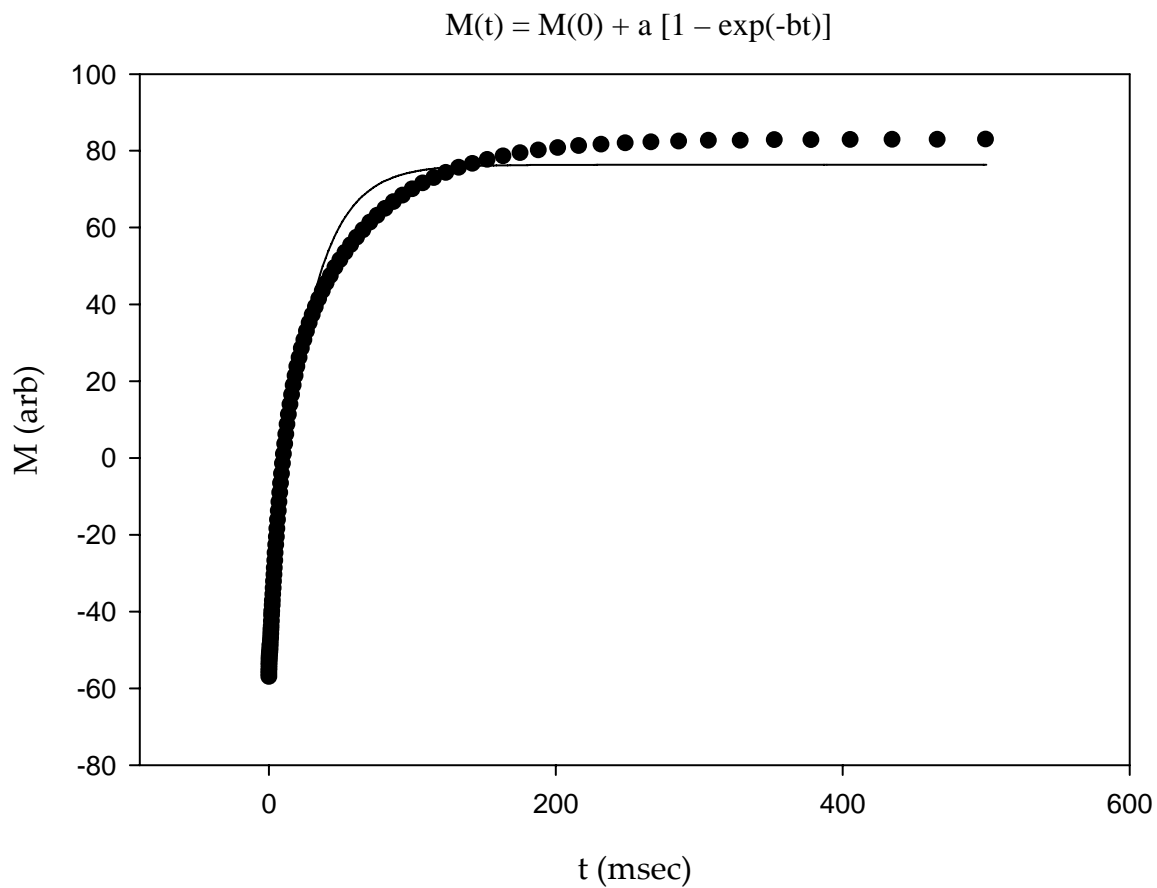

Best Fit Parameters:

$$M(0) = -54.1666 \pm 1.0652$$

$$a = 130.5173 \pm 1.3350$$

$$b = 0.0424 \pm 0.0013$$

$$R^2 = 0.9900$$

$$T_1 = 1/b, \text{ thus } T_1 = 23.58 \pm 0.72 \text{ msec}$$



Figure S8. Fit of Magnetization vs time curve of  $\text{Mn}^{2+}$  in 1:1 MeOH:H<sub>2</sub>O to a double exponential decay.

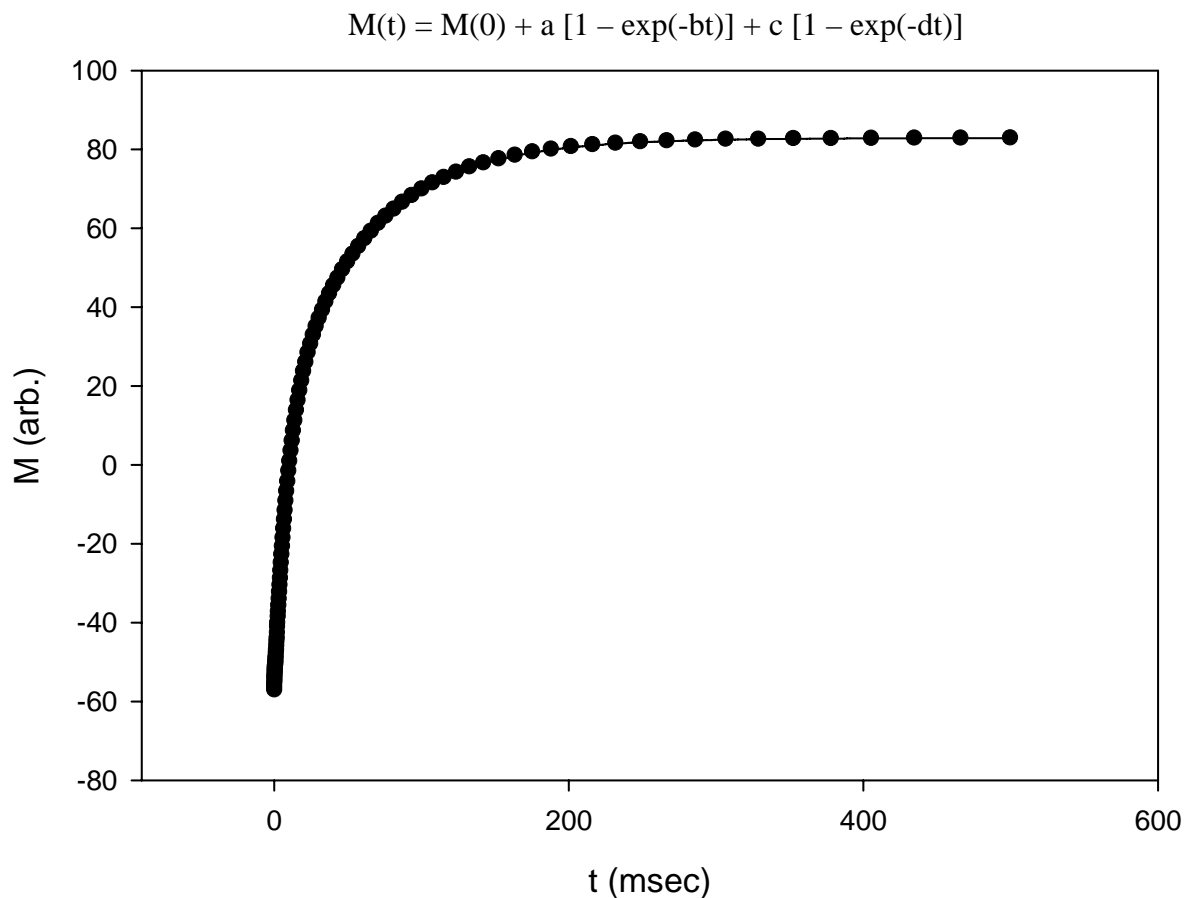

Best Fit Parameters:

$$M(0) = -61.3217 \pm 0.1272$$

$$a = 71.4374 \pm 0.6675$$

$$b = 0.1095 \pm 0.0013$$

$$c = 72.7559 \pm 0.6626$$

$$d = 0.0170 \pm 0.0002$$

$$R^2 = 0.9999$$

$$T_1^{\text{fast}} = 1/b, \text{ thus } T_1^{\text{fast}} = 9.13 \pm 0.11 \text{ msec with a relative weight of 49.5\%}$$

$$T_1^{\text{slow}} = 1/d, \text{ thus } T_1^{\text{slow}} = 58.52 \pm 0.69 \text{ msec with a relative weight of 51.5\%}.$$

Figure S9. Fit of Magnetization vs time curve of  $[\text{Mn}(\text{DOTAM})]^{2+}$  in 1:1 MeOH:H<sub>2</sub>O to a single exponential decay.

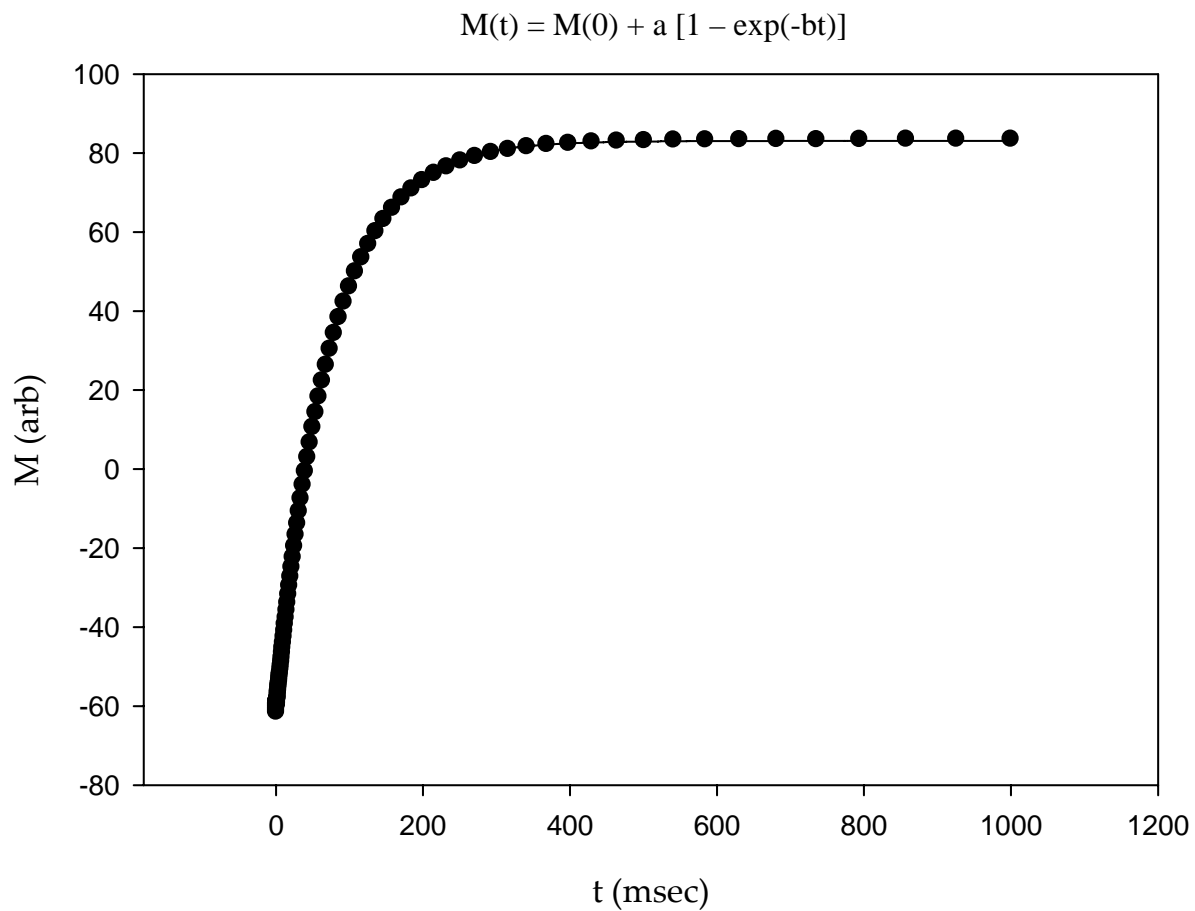

Best Fit Parameters:

$$M(0) = -62.2335 \pm 0.0913$$

$$a = 145.3273 \pm 0.1416$$

$$b = 0.0137 \pm 4.1740 \times 10^{-5}$$

$$R^2 = 0.9999$$

$$T_1 = 1/b, \text{ thus } T_1 = 72.99 \pm 0.22 \text{ msec}$$

Figure S10. Fit of Magnetization vs time curve of  $[\text{Mn}(\text{DOTAM})]^{2+}$  in 1:1 MeOH:H<sub>2</sub>O to a double exponential decay.

$$M(t) = M(0) + a [1 - \exp(-bt)] + c [1 - \exp(-dt)]$$

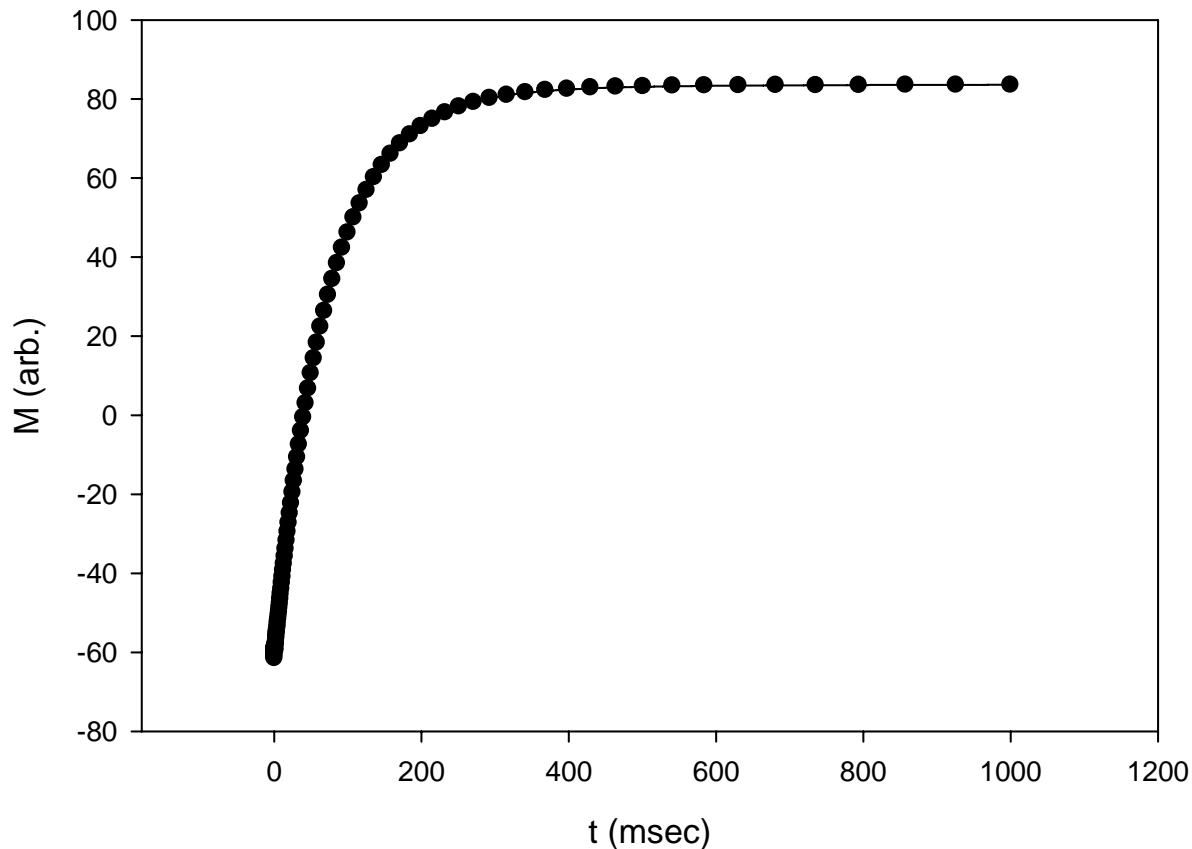

Best Fit Parameters:

$$M(0) = -62.3392 \pm 0.0936$$

$$a = 140.3313 \pm 6.3414$$

$$b = 0.0141 \pm 0.0003$$

$$c = 5.6410 \pm 6.1386$$

$$d = 0.0052 \pm 0.0037$$

$$R^2 = 0.9999.$$

$$T_1^{\text{fast}} = 1/b, \text{ thus } T_1^{\text{fast}} = 70.92 \pm 1.51 \text{ msec with a relative weight of } 96.1 \pm 4.3\%$$

$$T_1^{\text{slow}} = 1/d, \text{ thus } T_1^{\text{slow}} = 192.3 \pm 136.8 \text{ msec with a relative weight of } 3.9 \pm 4.2\%.$$

Table S5. Summary of Electrochemical Results.<sup>a</sup>

| Complex                         | $E_p^{\text{anodic}}$ (V) | $E_p^{\text{cathodic}}$ (V) |
|---------------------------------|---------------------------|-----------------------------|
| Mn(DO2A)                        | +1.0345                   | +0.723                      |
| Mn(H <sub>2</sub> DOTA)         | +0.828                    | +0.521                      |
| [Mn(DO3AM)]Cl <sub>2</sub>      | +0.965                    | +0.861                      |
| [Mn(DO3AM-CyOH)]Cl <sub>2</sub> | +0.902                    | +0.728                      |
| [Mn(DOTAM)]Cl <sub>2</sub>      | +0.984                    | +0.744                      |

a) Cyclic voltammetry at glassy carbon in 0.1M aqueous NaNO<sub>3</sub>, scan rate = 100 mV s<sup>-1</sup>. All potentials are reported vs SCE.
